# Supplementary material
Source: PubMed Central journal article supplement (PMC6002895)
Supplement: NIHMS950628-supplement-supplement_1.pdf [file NIHMS950628-supplement-supplement_1.pdf]

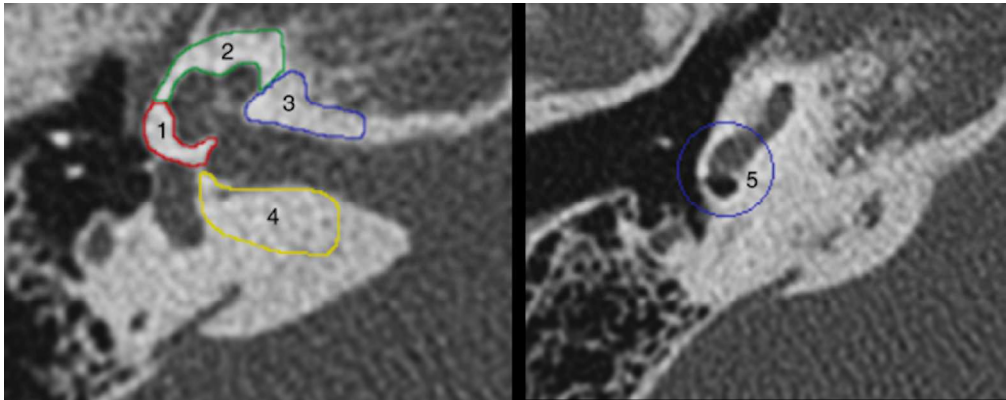

Supplemental online figure. Cavitory plaque location. Fenestral (zone 1), pericochlear (zone 2), anteroinferior wall of IAC (zone 3), posterior wall of IAC (zone 4), round window (zone 5).

228x91mm (600 x 600 DPI)
